# Supplementary material
Source: HighWire-hosted journal article supplement (https://cmajopen-stage.highwire.org/highwire/filestream/81368/field_highwire_adjunct_files/1/2019-0160-Web_image.pdf)

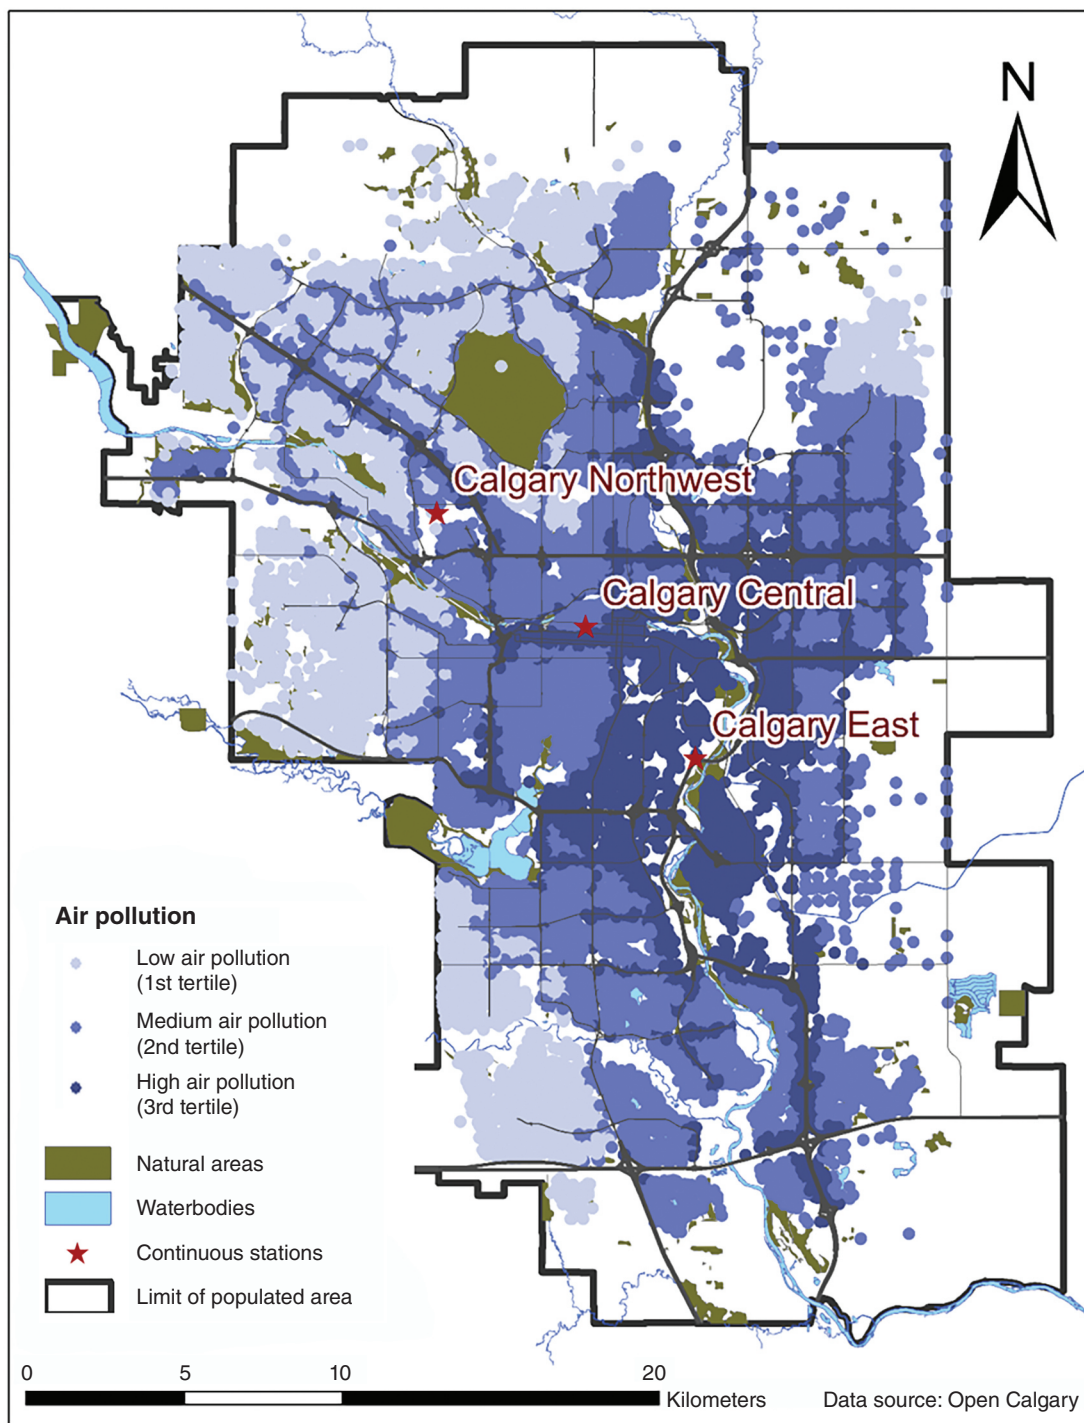

Supplement: 2019-0160-Web_image.pdf [file 2019-0160-Web_image.pdf]
